# Supplementary material for: Genome-Wide Analysis of Nuclear factor-YC Genes in the Tea Plant (Camellia sinensis) and Functional Identification of CsNF-YC6
Source: MDPI journal article supplement (doi:10.3390/ijms25020836), 2024-01-09
Supplement: s1 [file s1]

## SUPPORTING INFORMATION

# Genome-Wide Analysis of *Nuclear factor-YC* Genes in the Tea Plant (*Camellia sinensis*) and Functional Identification of *CsNF-YC6*

### Supporting Tables

**Table S1.** The primers used in the tests.

| Primer name           | Primer sequence (5' to 3')                                                                   | Used               |
|-----------------------|----------------------------------------------------------------------------------------------|--------------------|
| <i>CsNF-YC1</i>       | F: ATGGATCAGCACGGACAAC<br>R: TCAGAAAGCGGGCACAG                                               | Cloning            |
| <i>CsNF-YC2</i>       | F: ATGTTCTGGACGTACCAACGC<br>R: TTAAAATCTCTGCCTCCTAAATGTG                                     | Cloning            |
| <i>CsNF-YC3</i>       | F: ATGGATCAGCAAGGGC<br>R: TTAAGAATCTGCAGGTGGTT                                               | Cloning            |
| <i>CsNF-YC4</i>       | F: ATGGATCAACAAGGGCA<br>R: CTAATTTAGCAGATCACATCTG                                            | Cloning            |
| <i>CsNF-YC6</i>       | F: ATGGATCAGCAAGGGCAT<br>R: TTAAGAATCTGCAGGTGGTTGC                                           | Cloning            |
| <i>CsNF-YC7</i>       | F: ATGAGGCAAGCAAGAAC<br>R: TCACATTTGGCCACC                                                   | Cloning            |
| <i>CsNF-YC8</i>       | F: ATGAGACAAGCAGGAACATATTCAG<br>R: TCAAGTCCCATAAGCCTTACCA                                    | Cloning            |
| <i>CsNF-YC9</i>       | F: ATGGAGAACAACCAACAACA<br>R: TCACTTGGTAATGAGGTGC                                            | Cloning            |
| <i>CsNF-YC6-OE</i>    | F: gagaacacggggacgagctcATGGATCAGCAAGGGCATGG<br>R: gcccttgctcaccatgtcgacAGAATCTGCAGGTGGTTGCTG | Cloning            |
| <i>CsGAPDH</i> -qPCR  | F: GATAGTGTTACGGTCAATGGA<br>R: GCAGCAGCCTTATCCTTATCAG                                        | Internal reference |
| <i>CsNF-YC1</i> -qPCR | F: GCTTGCCTATCAACATATCCA<br>R: TGTTTTCTCAGTATGATTCCA                                         | Expressing         |
| <i>CsNF-YC2</i> -qPCR | F: ATCTCCGCCGAAGCC<br>R: GCCCACAATCTCTACCCCT                                                 | Expressing         |
| <i>CsNF-YC3</i> -qPCR | F: AACCATAGCCTTCCATTAGC<br>R: GATTCCAAGACCGTAGCG                                             | Expressing         |
| <i>CsNF-YC4</i> -qPCR | F: AGGAAAACAAAAGGAGGACA<br>R: AGGCGAATGCTGAGGTG                                              | Expressing         |
| <i>CsNF-YC5</i> -qPCR | F: AAGAGATGAGTTGAAAGAAGAGGG<br>R: TGGGGGGCTGAGGTTGT                                          | Expressing         |

| Primer name           | Primer sequence (5' to 3')                                       | Used               |
|-----------------------|------------------------------------------------------------------|--------------------|
| <i>CsNF-YC6</i> -qPCR | F: CAGTTACGGGGGTGATGG<br>R: GCTGCTGGTGGATGTGCT                   | Expressing         |
| <i>CsNF-YC7</i> -qPCR | F: TCTGCTGTTGTAGCCACTGAT<br>R: CTATGACTCCCACACCCCA               | Expressing         |
| <i>CsNF-YC8</i> -qPCR | F: GCCGCTGGCGAGGA<br>R: TCATCAGAGTTAGCAGAATCAGAA                 | Expressing         |
| <i>CsNF-YC9</i> -qPCR | F: CATCACTCGCACTGACATTTTC<br>R: GCTCCCTCCGCTGGC                  | Expressing         |
| <i>AtActin2</i> -qPCR | F: CTTGCACCAAGCAGCATGAA<br>R: CCGATCCAGACACTGTACTTCCTT           | Internal reference |
| <i>AtFLC</i> -qPCR    | F: CCTAATTTGATCCTCAGGTTTGGG<br>R: CCGACGAAGAAAAAGTAGATAGGCAC     | Expressing         |
| <i>AtSOC1</i> -qPCR   | F: GCTCTCAGTGCTTTGTGATGC<br>R: AAGAACGTACTTGGAGCTGGC             | Expressing         |
| <i>AtCO</i> -qPCR     | F: CCGGGTCTGCGAGTCATG<br>R: GGCATCATCTGCCTCACACA                 | Expressing         |
| <i>AtFD</i> -qPCR     | F: GCGCTAGGAAACAGGAATGCTTATACAAA<br>R: AGCTGTGGAAGACCGTTGAAGTGTG | Expressing         |
| <i>AtFT</i> -qPCR     | F: GAGACCCTCTTATAGTAAGCAGAGTTG<br>R: GGGAGTTCAAGTGAAAGAACCAAAGT  | Expressing         |
| <i>AtLFY</i> -qPCR    | F: TTGGTGGTTTAGAGGGACTATTCG<br>R: GCCGTAAAACCTAACTCCGCTA         | Expressing         |
| <i>AtAPI</i> -qPCR    | F: AACCAAGGCCACAATATGCC<br>R: CGGGTTCAAGAGTCAGTTCG               | Expressing         |
| <i>AtDREB2A</i> -qPCR | F: TGACCTAAATGGCGACGATGT<br>R: TCCAAGTAACTCAAGTCGTGC             | Expressing         |
| <i>AtNCED3</i> -qPCR  | F: CAGCTTGTAGCTTTTGGGCTGTA<br>R: TAACAGAAACCAGCTGAGCTCGA         | Expressing         |
| <i>AtRD29A</i> -qPCR  | F: GTTACTGATCCCACCAAAGAAGA<br>R: GGAGACTCATCAGTCACTTCCA          | Expressing         |
| <i>AtABI1</i> -qPCR   | F: AGAGTGTGCCTTTGTATGGTTTTA<br>R: CATCCTCTCTCTACAATAGTTCGCT      | Expressing         |
| <i>AtABI5</i> -qPCR   | F: CAATAAGAGAGGGATAGCGAACGAG<br>R: CGTCCATTGCTGTCTCCTCCA         | Expressing         |
| P1300                 | F: TCATTGCGATAAAGGAAAGGC<br>R: GCCACGATTTGACACATTTTTAC           | Identification     |
| <i>CZCsNF-YC6</i>     | F: ACGCACAATCCCACTATCCTTC<br>R: CGTTTACGTCGCCGTCCAG              | Identification     |
| hyg(280)              | F: ACGGTGTCGTCCATCACAGTTTGCC<br>R: ttccGGAAGTGCTTGACATTGGGGA     | Identification     |

**Table S2.** Tea plant *NF-YC* family members predict

| Gene name | Sequence ID    | Chromosome number                 | Chromosome location (bp) | HMM length | E value  | AA  | Molecular weight (KDa) | Isoelectric |
|-----------|----------------|-----------------------------------|--------------------------|------------|----------|-----|------------------------|-------------|
| CsNF-YC1  | GWHPACFB011961 | 2                                 | 107147531-107148430      | 64         | 3.70E-21 | 260 | 29.32                  | 5.85        |
| CsNF-YC2  | GWHPACFB013851 | 3                                 | 104792750-104795981      | 64         | 1.6E-20  | 177 | 19.96                  | 5.38        |
| CsNF-YC3  | GWHPACFB026946 | ChaUn10827<br>(TEA022201.1: chr4) | 13103-13882              | 64         | 1.00E-21 | 228 | 25.41                  | 5.77        |
| CsNF-YC4  | GWHPACFB020260 | 6                                 | 107576981-107578654      | 64         | 3.40E-21 | 247 | 27.59                  | 6.05        |
| CsNF-YC5  | GWHPACFB024733 | 8                                 | 152348395-152350737      | 64         | 6.80E-21 | 309 | 34.58                  | 5.45        |
| CsNF-YC6  | GWHPACFB033498 | ChaUn9861<br>(TEA002102.1: chr10) | 29812-42002              | 64         | 3.50E-21 | 480 | 52.95                  | 6.01        |
| CsNF-YC7  | GWHPACFB005786 | 12                                | 8344610-8345166          | 65         | 3.20E-21 | 153 | 16.43                  | 10.01       |
| CsNF-YC8  | GWHPACFB009167 | 14                                | 54319197-54320242        | 65         | 5E-21    | 126 | 13.67                  | 9.3         |
| CsNF-YC9  | GWHPACFB031341 | ChaUn5166<br>(TEA008802.1: chr15) | 28410-29461              | 64         | 1.60E-20 | 230 | 25.51                  | 5.33        |

**Table S3.** Basic information of all identified *CsNF-YCs* genes in tea plant.

| Gene name       | Identities | ORF (bp) | AA  | pI   | Molecular weight (KDa) | Instability Index | Aliphatic Index | GRAVY  | SignalP | TMHs |
|-----------------|------------|----------|-----|------|------------------------|-------------------|-----------------|--------|---------|------|
| <i>CsNF-YC1</i> | 95.60%     | 747      | 248 | 5.85 | 27.98                  | 71.06             | 68.87           | -0.668 | NO      | 0    |
| <i>CsNF-YC2</i> | 98.80%     | 501      | 166 | 5.04 | 18.54                  | 51.09             | 83.43           | -0.316 | NO      | 0    |
| <i>CsNF-YC3</i> | 87.82%     | 780      | 259 | 5.88 | 28.74                  | 71.24             | 64.48           | -0.605 | NO      | 0    |
| <i>CsNF-YC4</i> | 86.71%     | 1011     | 336 | 7.21 | 37.82                  | 65.80             | 68.01           | -0.619 | NO      | 0    |
| <i>CsNF-YC6</i> | 99.86%     | 726      | 241 | 5.81 | 27.12                  | 72.33             | 66.06           | -0.648 | NO      | 0    |
| <i>CsNF-YC7</i> | 94.34%     | 372      | 123 | 9.77 | 13.28                  | 62.03             | 72.11           | -0.341 | NO      | 0    |
| <i>CsNF-YC8</i> | 98.60%     | 357      | 118 | 7.85 | 12.92                  | 46.71             | 88.47           | -0.226 | NO      | 0    |
| <i>CsNF-YC9</i> | 97.69%     | 729      | 242 | 5.06 | 26.83                  | 67.18             | 75.83           | -0.378 | NO      | 0    |

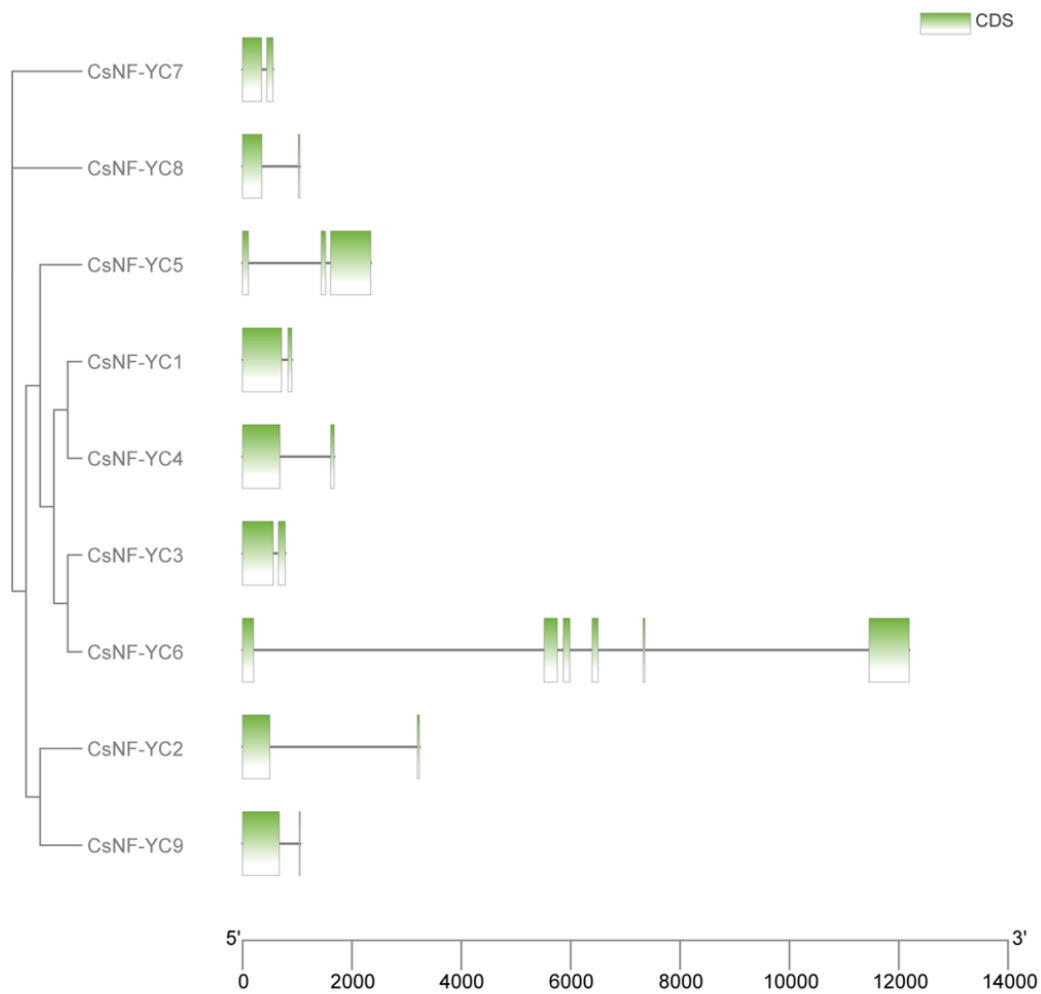

**Figure S1.** Exon-intron structure of *CsNF-YCs* genes.

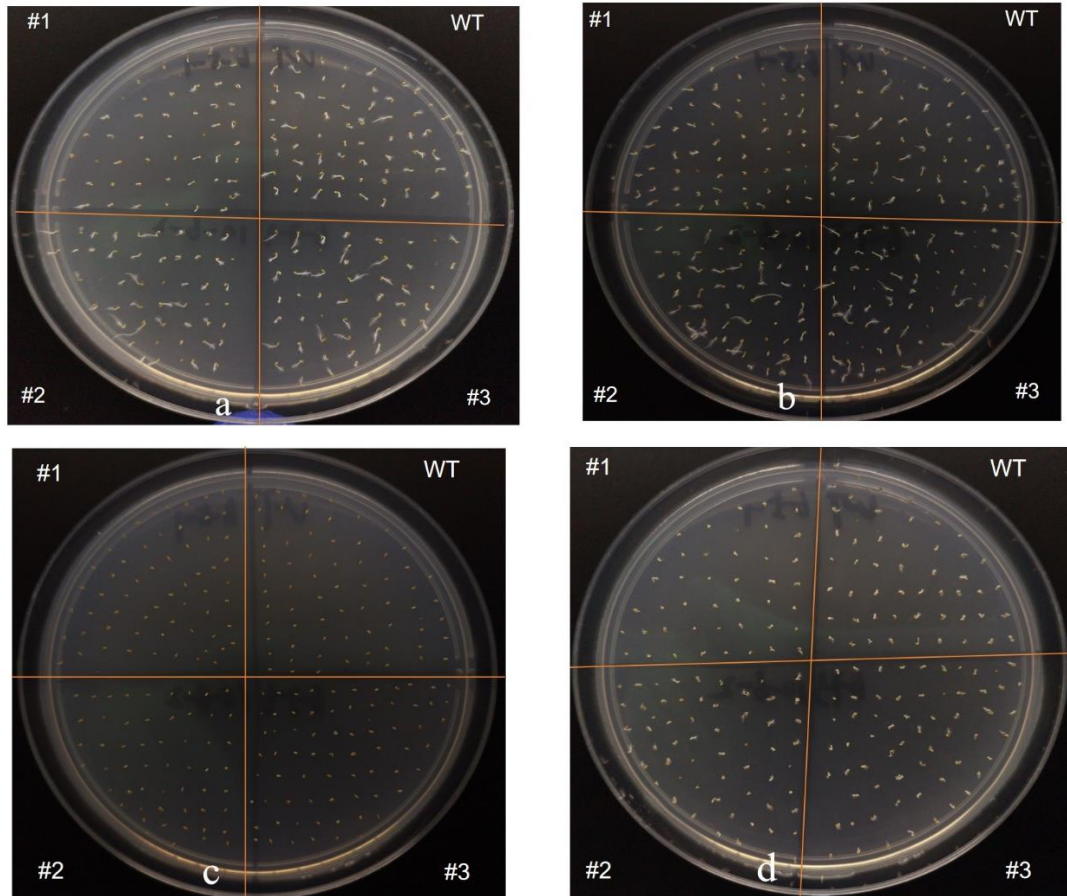

**Figure S2.** The phenotype of WT and three lines grown in 1/2 MS (a), 0.5  $\mu$ M GA (b), 0.5  $\mu$ M ABA (c) and 150 mM NaCl (d) medium for 4 days

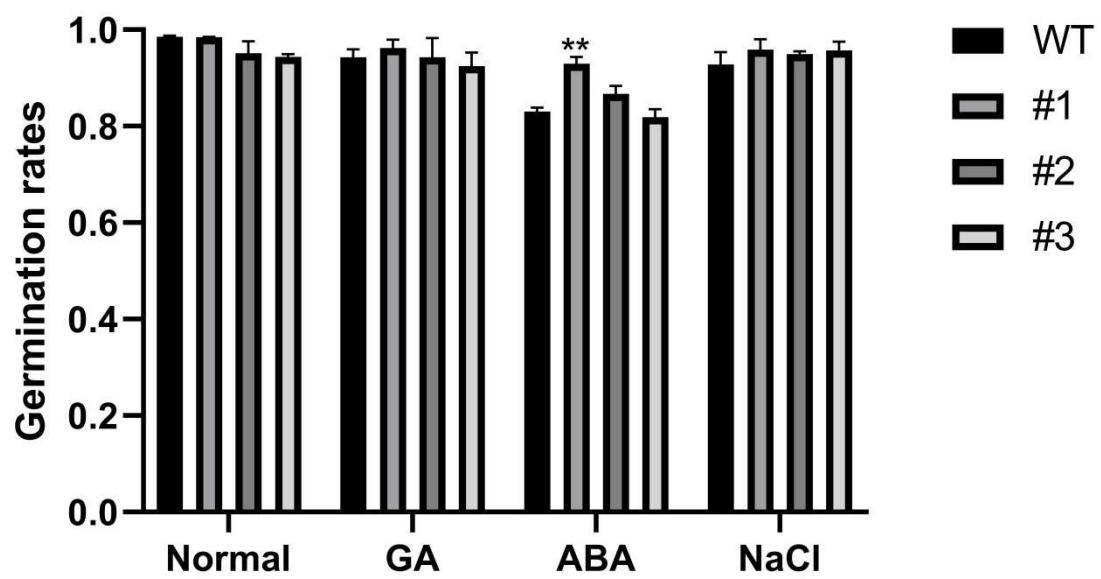

**Figure S3.** Germination rates of *CsNF-YC6-OE* Arabidopsis lines under different stress condition

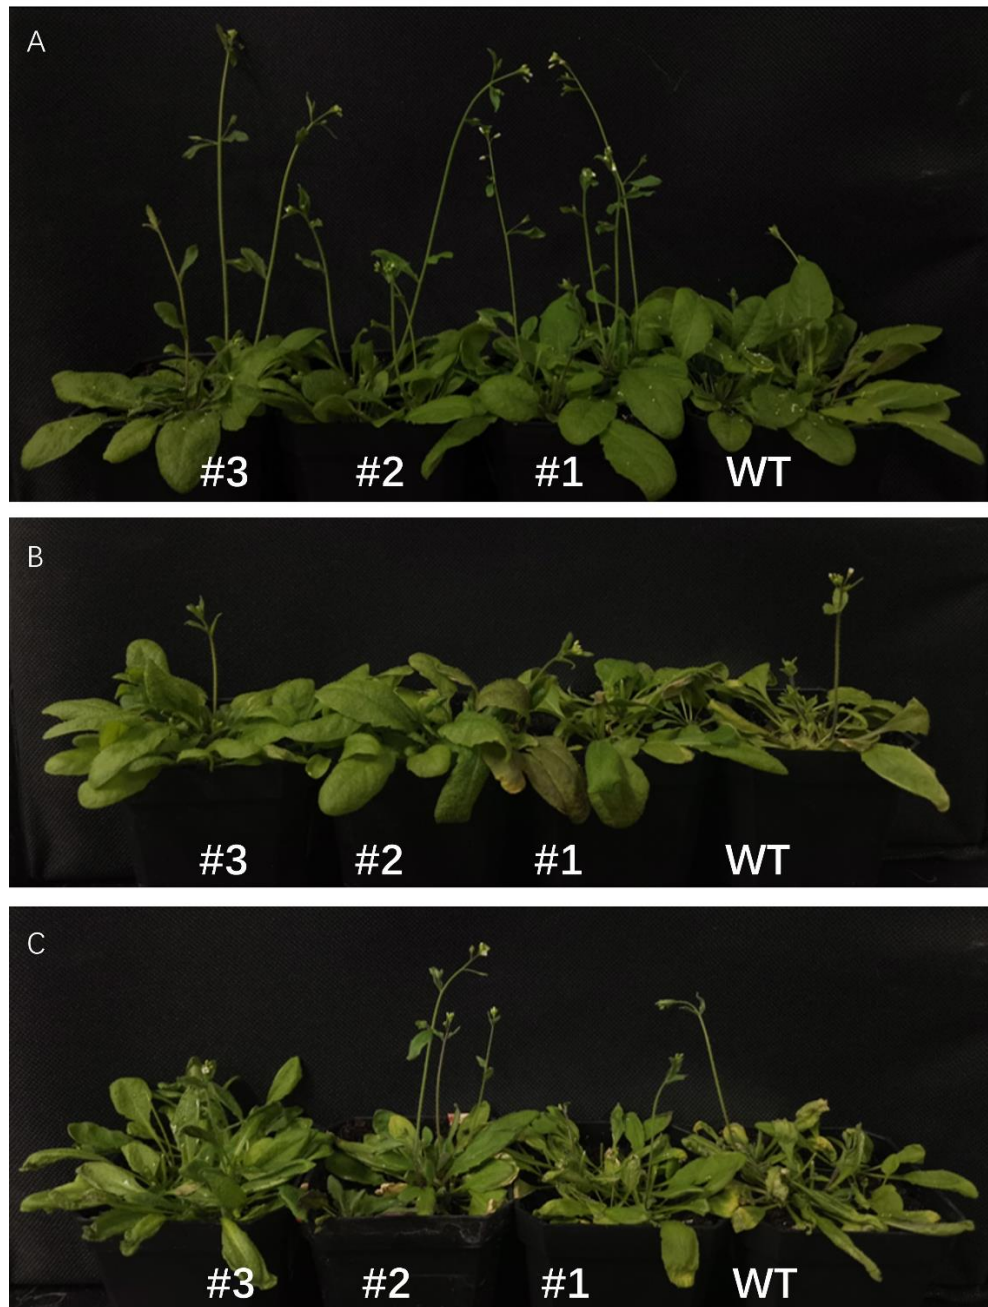

**Figure S4.** Phenotypic analysis of CsNF-YC6- overexpressed *Arabidopsis thaliana* lines and wild-type under different stresses: normal culture conditions (A), 200 mM NaCl treatment (B) and 15% PEG treatment (C).



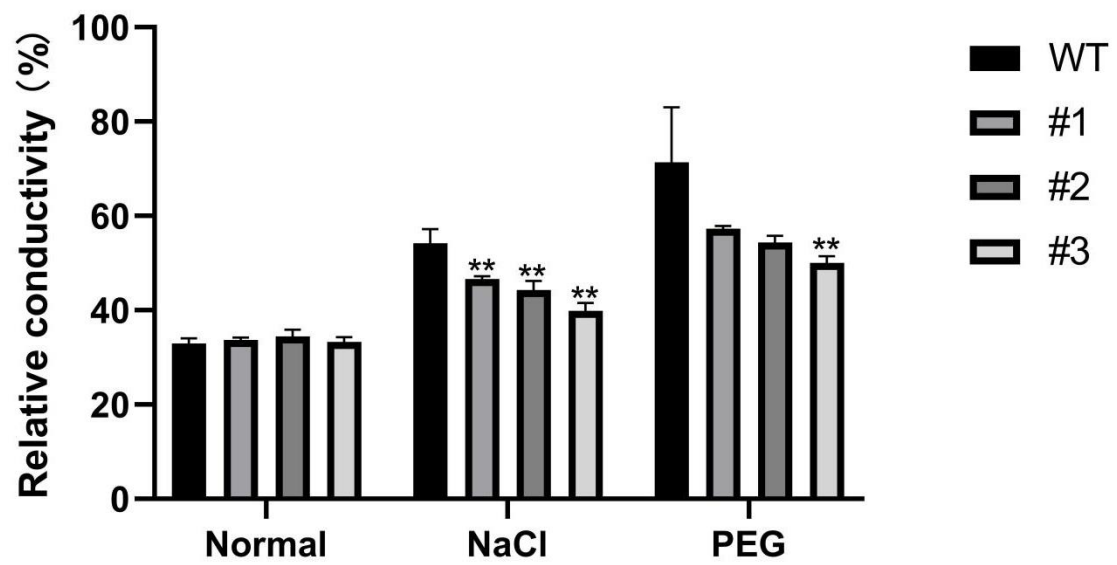

**Figure S5.** The relative conductivity of wild type and *CsNF-YC6-OE* Arabidopsis under stress.

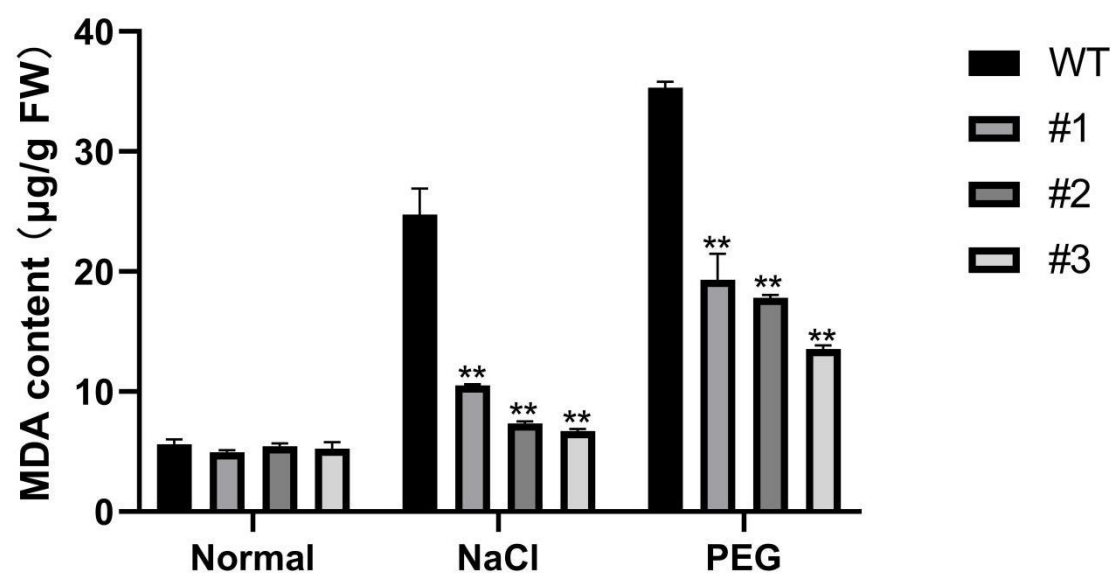

**Figure S6.** The MDA content of wild type and *CsNF-YC6-OE* Arabidopsis under stress.

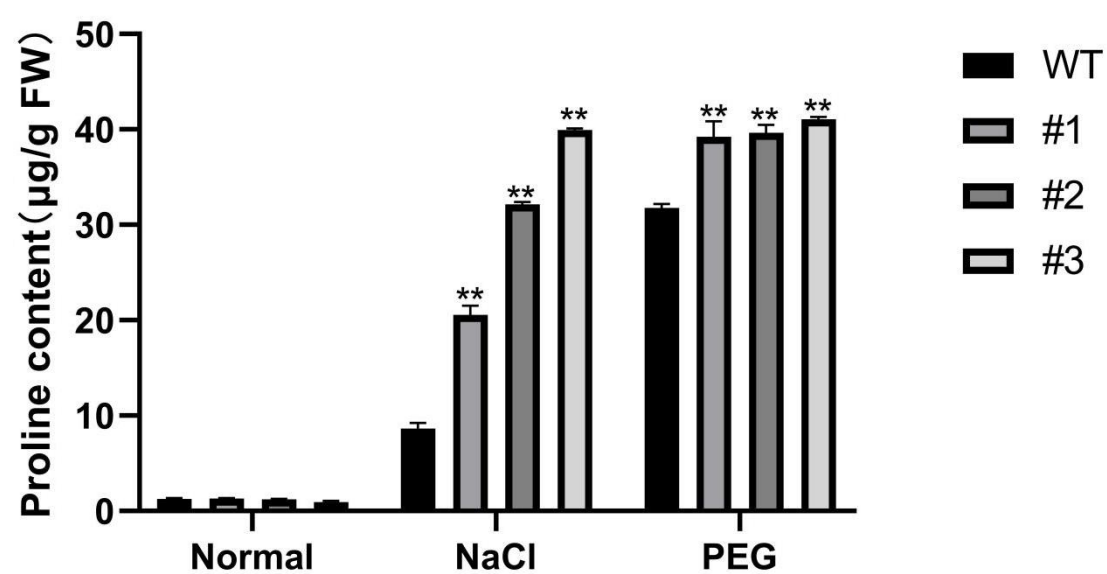

**Figure S7.** The proline content of wild type and *CsNF-YC6-OE* Arabidopsis under stress.
